# Supplementary material
Source: PubMed Central journal article supplement (PMC5320866)

**Supplemental Figure S1.** Consort Diagram: Selection of cases and controls from three clinical trial cohorts; CALGB 19802, CALGB 10102 and C10403 for vincristine-induced peripheral neuropathy analysis.

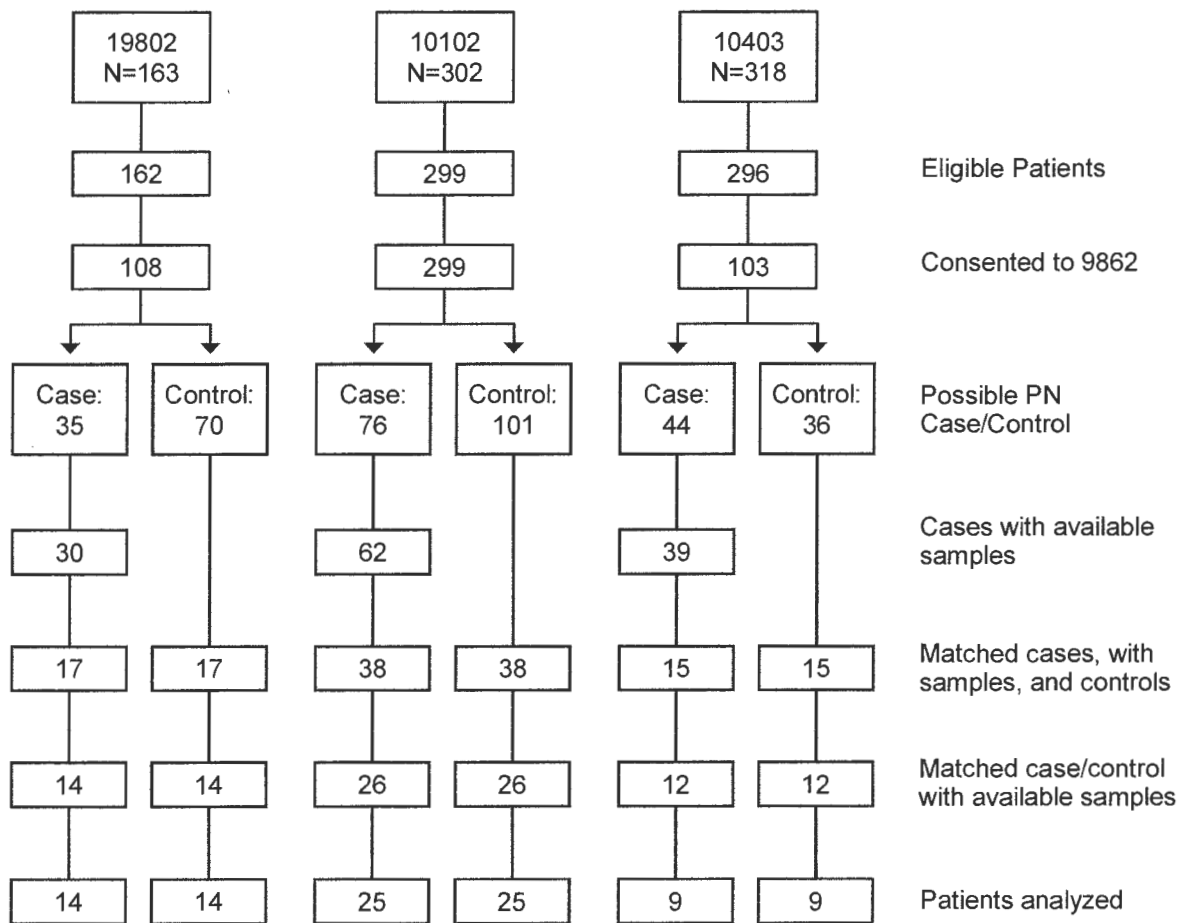

Supplement: NIHMS816918-supplement-Supp_Fig_S1.pdf [file NIHMS816918-supplement-Supp_Fig_S1.pdf]
