# Supplementary material
Source: PubMed Central journal article supplement (PMC5320866)

**Supplemental Figure S2.** The CEP72 T/T promoter genotype (rs(924706) is associated with a significantly higher risk of vincristine induced neuropathy in both adults and children with ALL. Percentages of patients who developed grade 2-4 vincristine-induced peripheral neuropathy (red bars) is shown among adults (left) and children (right) receiving protocol-directed combination chemotherapy for acute lymphoblastic leukemia. Adults are from current case-control study and children are as previously reported by Diouf et al<sup>1</sup>.

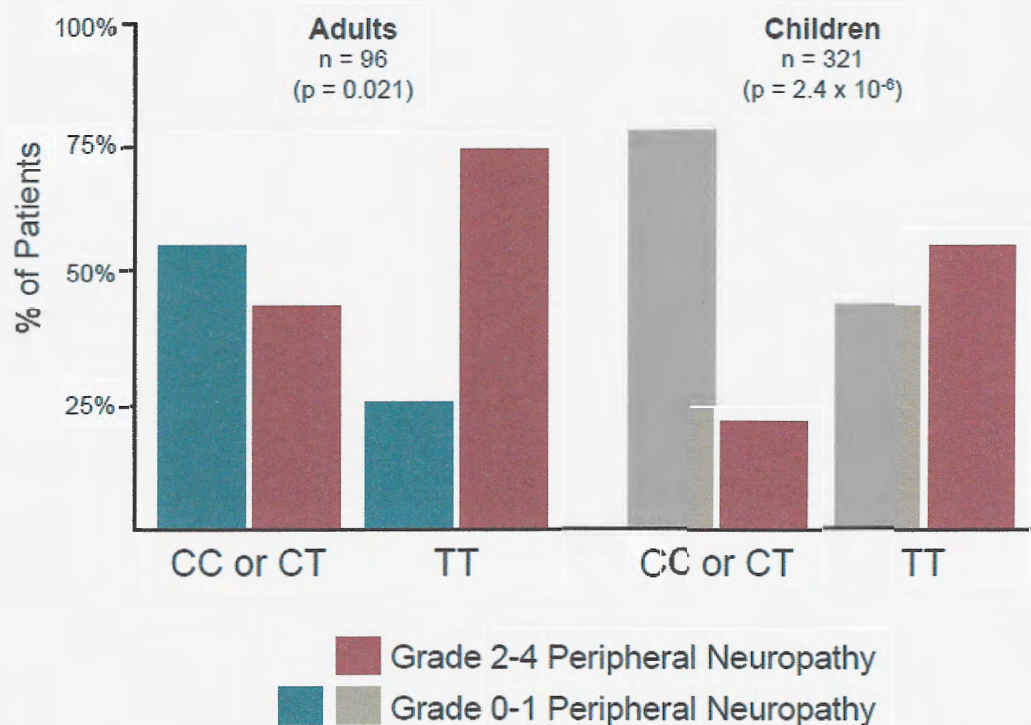

Supplement: NIHMS816918-supplement-Supp_Fig_S2.pdf [file NIHMS816918-supplement-Supp_Fig_S2.pdf]
