# Supplementary material
Source: PubMed Central journal article supplement (PMC5320866)
Supplement: NIHMS816918-supplement-Supp_info.pdf [file NIHMS816918-supplement-Supp_info.pdf]

## **An inherited genetic variant in *CEP72* promoter predisposes to vincristine-induced peripheral neuropathy in adults with acute lymphoblastic leukemia**

Wendy Stock, MD<sup>1,2\*</sup>, Barthelemy Diouf, PharmD, PhD<sup>3,4</sup>, Kristine R. Crews, PharmD<sup>3,4</sup>, Deqing Pei, MS<sup>3, 5</sup>, Cheng Cheng, PhD<sup>3,5</sup>, Kristina Laumann, BA<sup>2,6</sup>, Sumithra J. Mandrekar, PhD<sup>2,6</sup>, Selina Luger, MD<sup>7</sup>, Anjali Advani, MD<sup>8</sup>, Richard M. Stone, MD<sup>2</sup>, Richard A. Larson, MD<sup>1,2</sup>, and William E. Evans, PharmD.<sup>3,4\*</sup>

1. Section of Hematology Oncology, University of Chicago Medicine and Comprehensive Cancer Center, Chicago, IL
2. Alliance for Clinical Trials in Oncology, Chicago IL
3. Hematological Malignancies Program, St. Jude Children's Research Hospital, Memphis, TN
4. Department of Pharmaceutical Sciences, St. Jude Children's Research Hospital, Memphis, TN
5. Department of Biostatistics, St. Jude Children's Research Hospital, Memphis, TN
6. Alliance Statistics and Data Center; Division of Biomedical Statistics and Informatics, Mayo Clinic, Rochester, MN
7. University of Pennsylvania, ECOG-ACRIN Cancer Research Group, Philadelphia, PA
8. Cleveland Clinic, Southwest Oncology Cooperative Group, Cleveland, OH

\*Correspondence: Dr. Wendy Stock, [wstock@medicine.bsd.uchicago.edu](mailto:wstock@medicine.bsd.uchicago.edu), University of Chicago, Chicago, IL or Dr. William E. Evans, [william.evans@stjude.org](mailto:william.evans@stjude.org), St. Jude Children's Research Hospital 262 Danny Thomas place, Memphis, TN 38105, USA; Phone: (901) 495-3301; Fax: (901) 525-6869

### **Supplementary Information**

## Reference

1. Diouf, B. et al. Association of an inherited genetic variant with vincristine-related peripheral neuropathy in children with acute lymphoblastic leukemia. *JAMA* 313, 815-823 (2014).
